# Supplementary material
Source: PubMed Central journal article supplement (PMC8718109)
Supplement: NIHMS1766572-supplement-Suppl_Fig.pdf [file NIHMS1766572-supplement-Suppl_Fig.pdf]

# Selective Labeling and Identification of the Tumor Cell Proteome of Pancreatic Cancer *In Vivo*

Nancy G. Azizian<sup>1,2</sup>, Delaney K. Sullivan<sup>3</sup>, Litong Nie<sup>4</sup>, Sammy Pardo<sup>5</sup>, Dana Molleur<sup>5</sup>, Junjie Chen<sup>4</sup>, Susan T. Weintraub<sup>5</sup>, Yulin Li<sup>1,2\*</sup>

<sup>1</sup>Center for Immunotherapy Research, Houston Methodist Research Institute, Houston, TX 77030, USA; <sup>2</sup>Department of Medicine, Weill Cornell Medical College, New York, NY 10065, USA; <sup>3</sup>UCLA-Caltech Medical Scientist Training Program, David Geffen School of Medicine, University of California, Los Angeles, Los Angeles, CA 90095, USA; <sup>4</sup>Department of Experimental Radiation Oncology, Division of Radiation Oncology, The University of Texas MD Anderson Cancer Center, Houston, TX 77030, USA; <sup>5</sup>Department of Biochemistry and Structural Biology, The University of Texas Health Science Center at San Antonio, San Antonio, TX 78229, USA.

## Supplementary data

### Supplementary figures

**Supplementary Fig S1.** Full size image of the Western blot presented in Figure 2A.

**Supplementary Fig S2.** Detection of ANL-labeled proteins by TAMRA-DBCO and SDS-PAGE in cell lines with or without MetRS<sup>L274G</sup> transgene.

**Supplementary Fig S3.**  $\alpha$ -SMA antibody identifies stromal fibroblasts in the tumor bulk.

**Supplementary Fig S4.** Densitometric analysis of Coomassie blue and TARMA-alkyne stained SDS-PAGE gel for tumor sample lanes 5-11.

**Supplementary Fig S5.** Pearson correlation of DIA-MS data from the BONCAT (S5A), and the Bulk samples (S5B).

**Supplementary Fig S6.** Venn diagram of the number of proteins identified by BONCAT enrichment in the ANL-labeled samples compared to the Met-labeled samples.

**Supplementary Fig S7.** IHC analysis of protein candidates preferentially present in pancreatic tumor cells.

### Supplementary tables (Provided as separate .xlsx file)

**Supplementary Table S1.** List of proteins identified in BONCAT-enriched samples by DIA-MS.

**Supplementary Table S2.** List of proteins identified in the tumor bulk lysates by DIA-MS.

**Supplementary Table S3.** Ratio of protein abundance in BONCAT-ANL versus Bulk-ANL samples.

**Supplementary Table S4.** Levels of marker proteins from tumor and non-tumor cells within the tumor microenvironment.

**Supplementary Table S5.** GO term analysis of proteins enriched in tumor cells.

**Supplementary Table S6.** GO term analysis of proteins enriched in the tumor microenvironment.

## Supplementary Fig S1

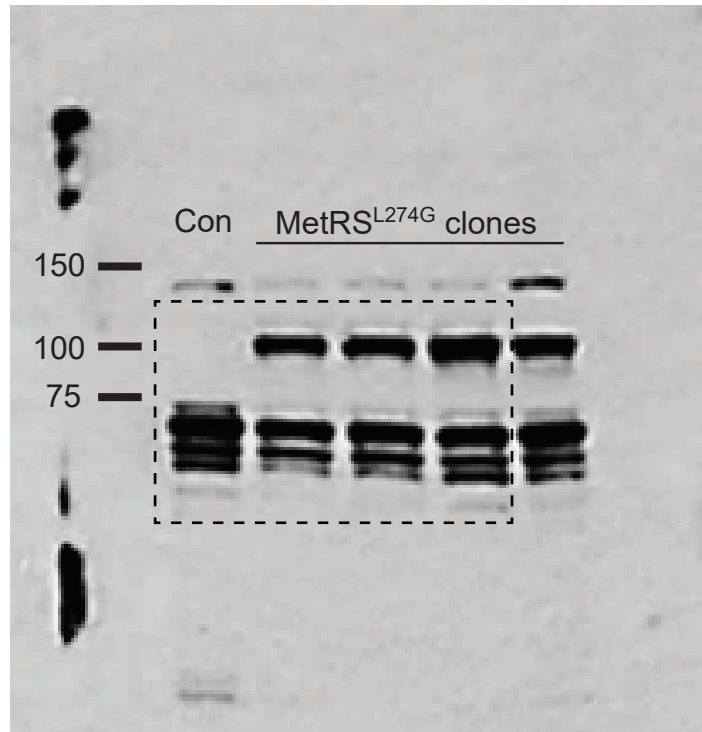

**Supplementary Fig S1.** Full size image of the Western blot presented in Figure 2A. The molecular weight of the protein ladder is labeled on the left side.

## Supplementary Fig S2

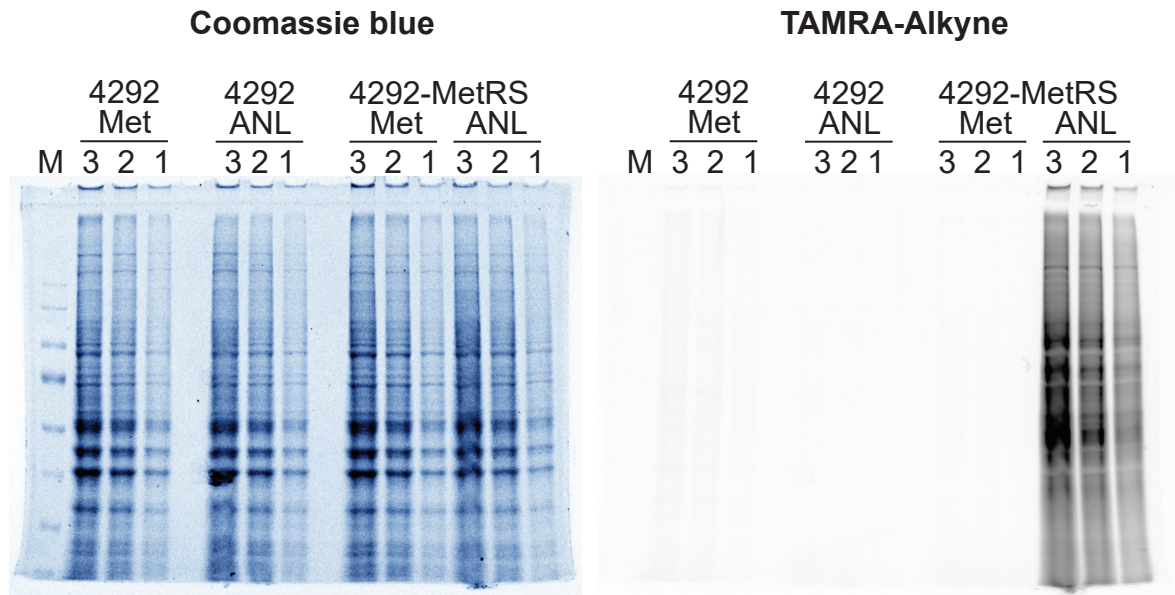

**Supplementary Fig S2.** Detection of ANL-labeled proteins by TAMRA-DBCO and SDS-PAGE in cell lines with or without MetRS<sup>L274G</sup> transgene.

**Supplementary Fig S3**

anti-SMA (brown staining)

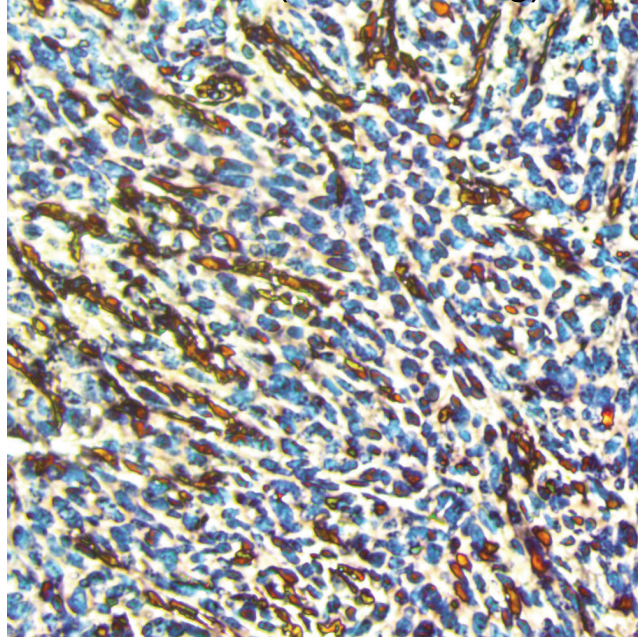

**Supplementary Fig S3.**  $\alpha$ -SMA antibody identifies stromal fibroblasts in the tumor bulk.

## Supplementary Fig S4

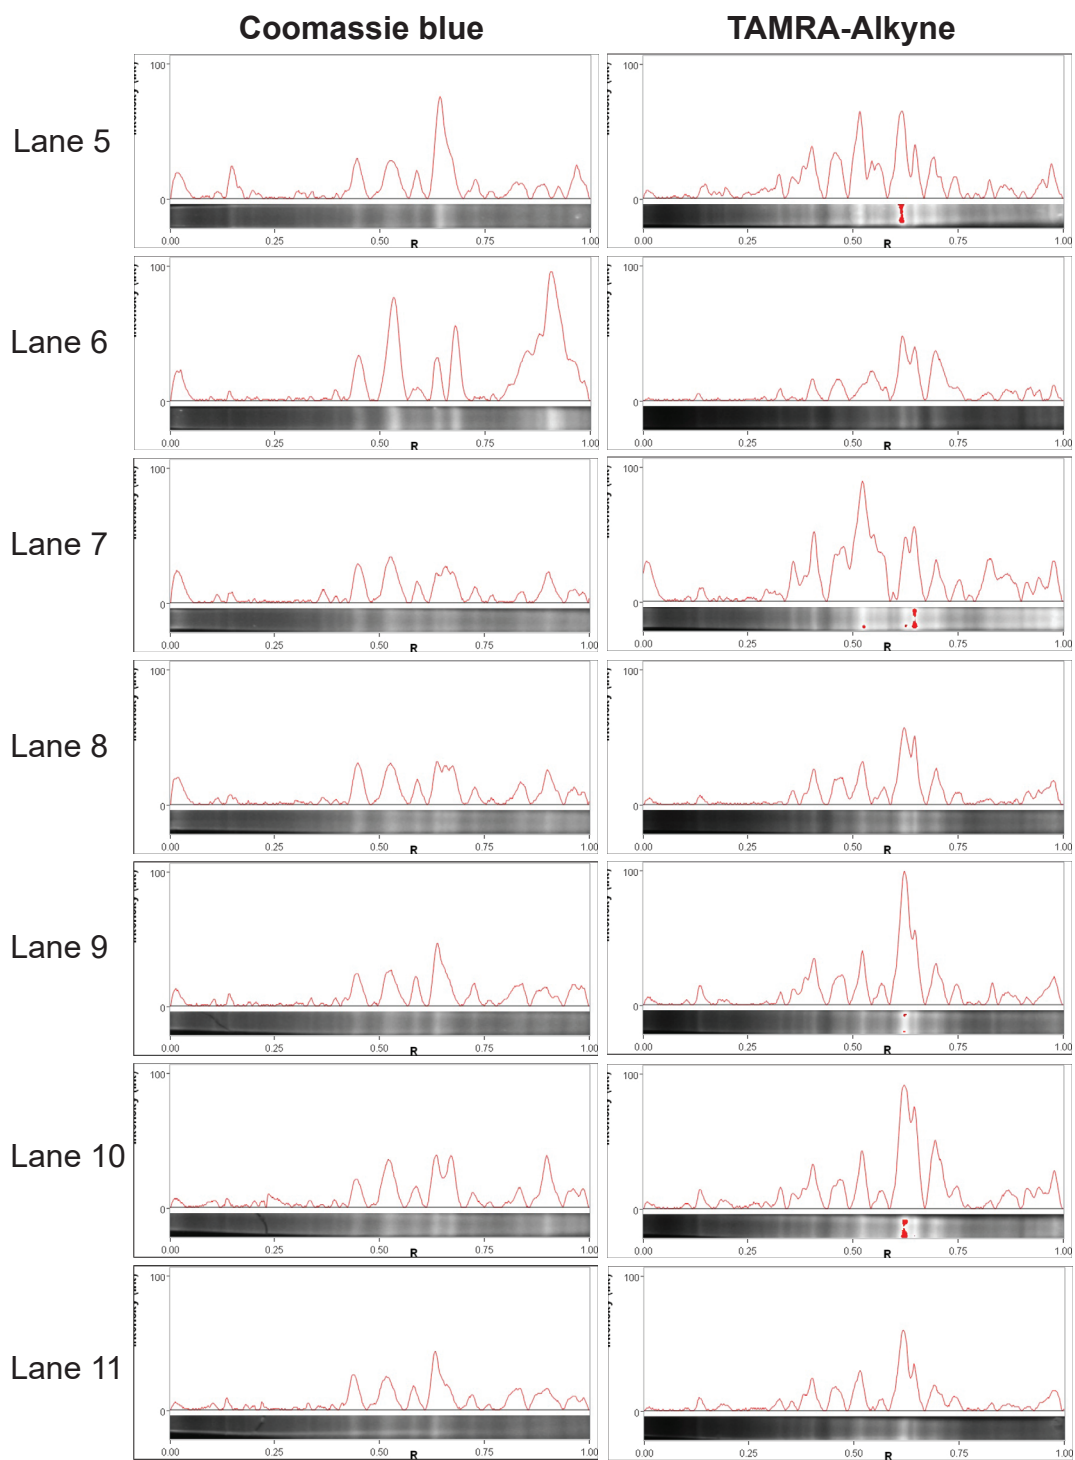

**Supplementary Fig S4.** Densitometric analysis of Coomassie blue and TAMRA-alkyne stained SDS-PAGE gel for tumor sample lanes 5-11.

# Supplementary Fig S5

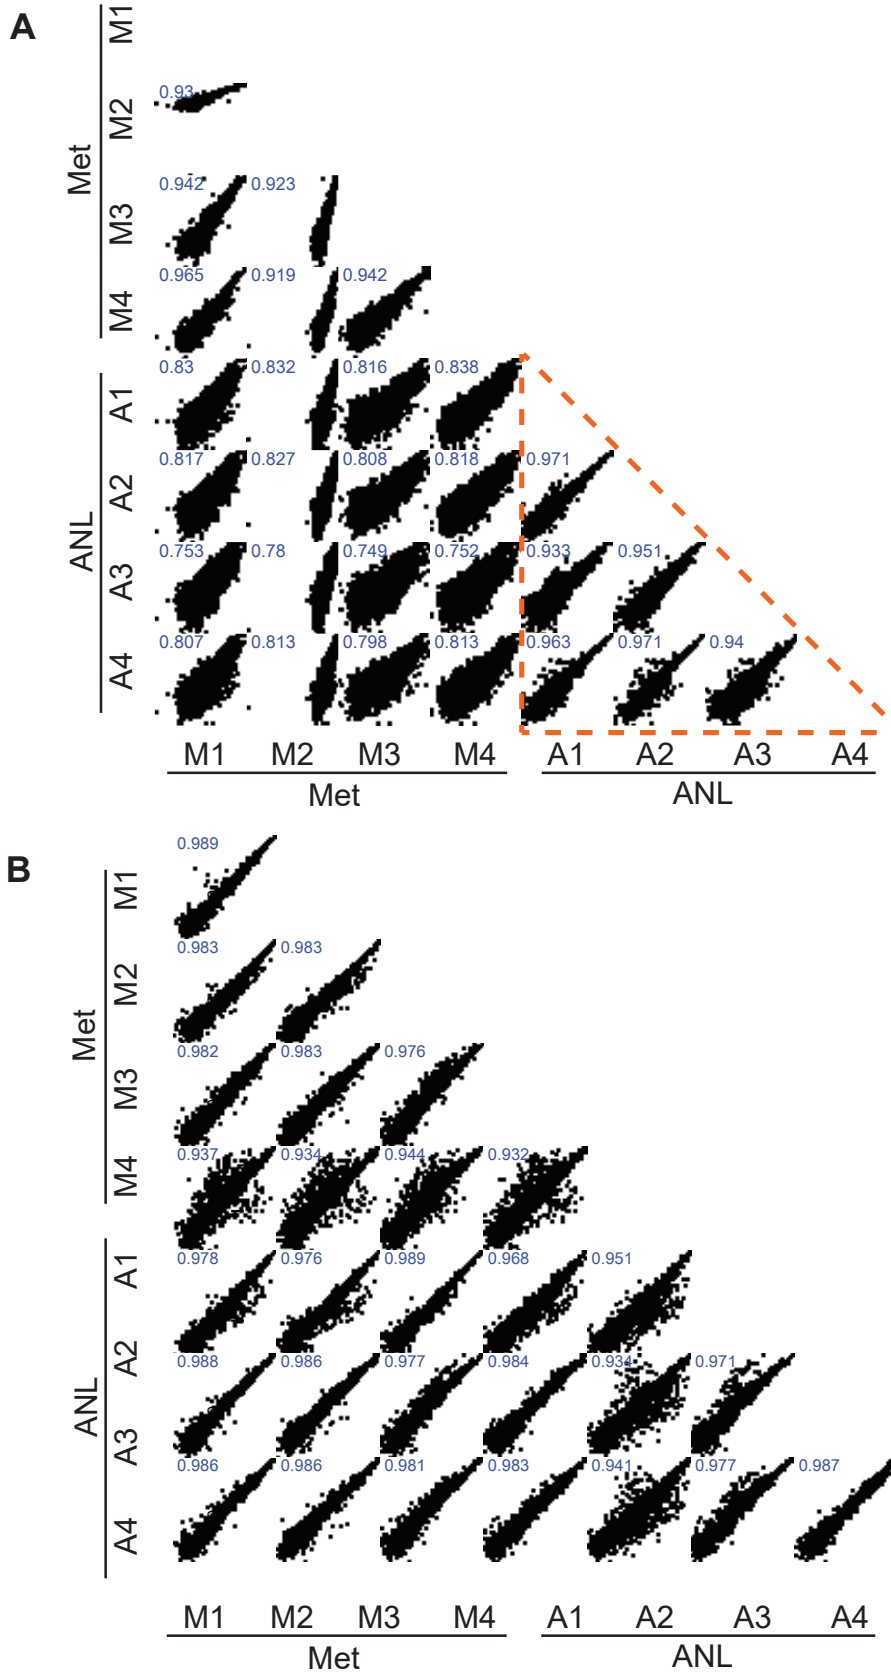

**Supplementary Fig S5.** Pearson correlation of DIA-MS data from the BONCAT (S5A), and the Bulk samples (S5B). The correlation coefficients are labeled above the dot plots. Dashed triangle indicates the correlation among BONCAT-ANL samples.

## Supplementary Fig S6

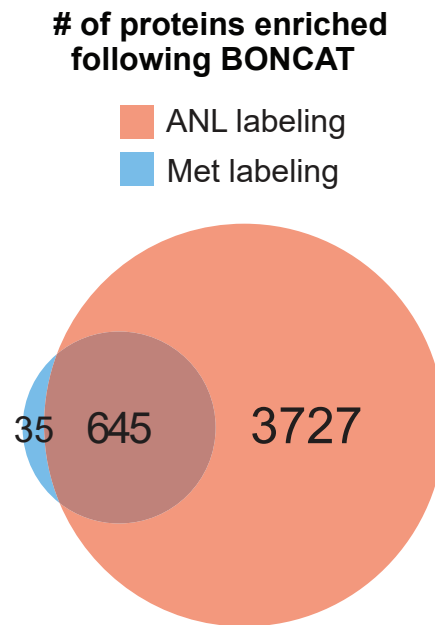

**Supplementary Fig S6.** Venn diagram of the number of proteins identified by BONCAT enrichment in the ANL-labeled samples compared to the Met-labeled samples.



**Supplementary Fig S7**

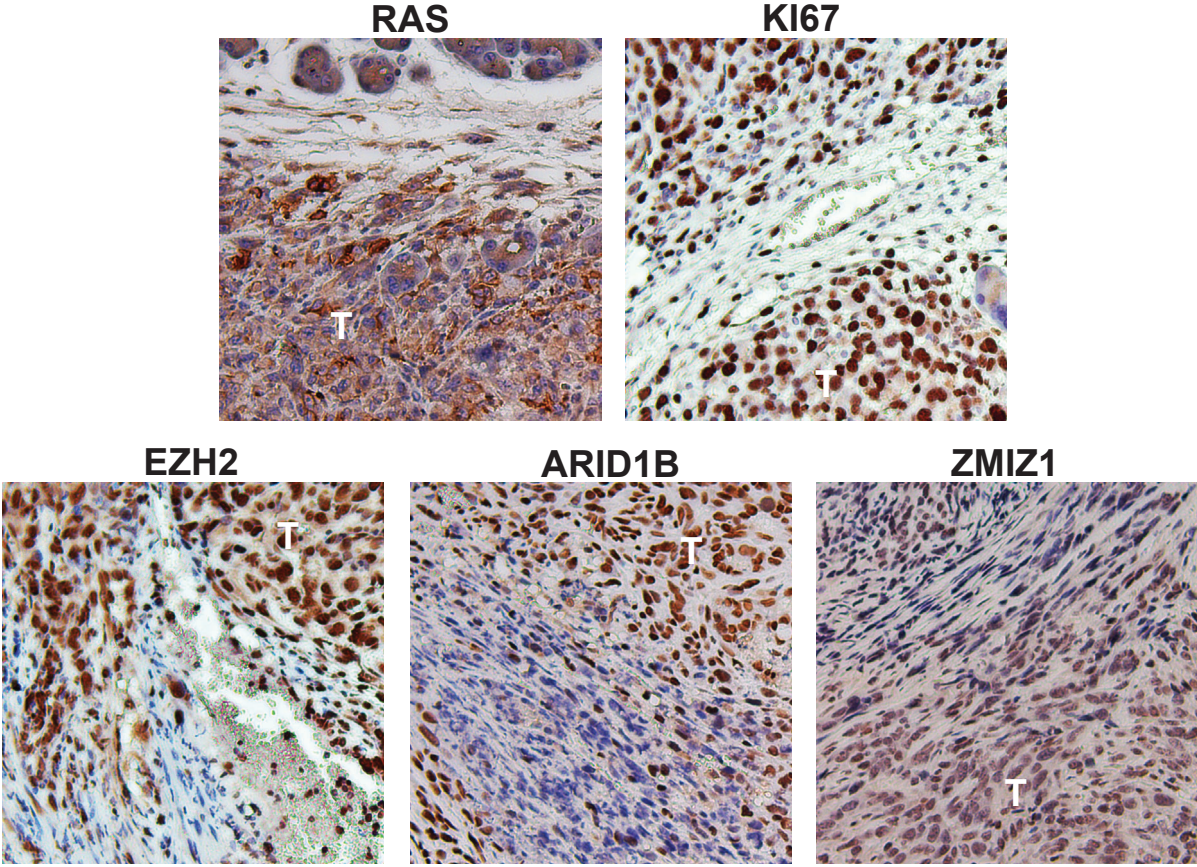

**Supplementary Fig S7.** IHC analysis of protein candidates preferentially present in pancreatic tumor cells. The tumor cells with dark brown staining are indicated with “T”.
